# Supplementary material for: KCHO-1, a novel herbal anti-inflammatory compound, attenuates oxidative stress in an animal model of amyotrophic lateral sclerosis
Source: PubMed Central journal article supplement — J Vet Sci. 2017 Dec 18;18(4):487–97. doi: 10.4142/jvs.2017.18.4.487 (PMC5746442; doi:10.4142/jvs.2017.18.4.487), 2017-12-18
Supplement: jvs-18-487-s001.pdf [file jvs-18-487-s001.pdf]

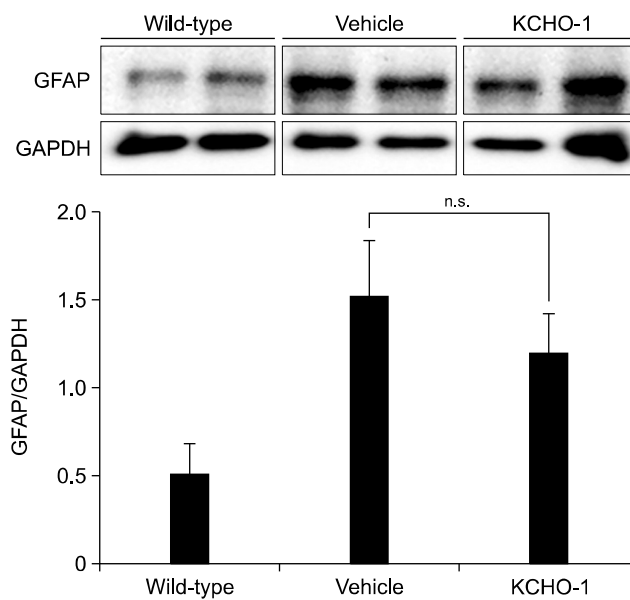

**Supplementary Fig. 1.** Western blot images of glial fibrillary acidic protein (GFAP) expression in the spinal cord of hSOD1<sup>G93A</sup> Tg mice showed that astrocytes were not significantly reduced in the KCHO-1-treated group from that in the vehicle group. GAPDH, glyceraldehyde 3-phosphate dehydrogenase; n.s., no significant difference.
